# Supplementary material
Source: PubMed Central journal article supplement (PMC7747308)
Supplement: 40820_2017_157_MOESM1_ESM.pdf [file 40820_2017_157_MOESM1_ESM.pdf]

Supporting Information for

# Creation of Triple Hierarchical Micro-Meso-Macroporous N-doped Carbon Shells with Hollow Cores towards the Electrocatalytic Oxygen Reduction Reaction

Ruohao Xing<sup>1,2</sup>, Tingsheng Zhou<sup>2</sup>, Yao Zhou<sup>2</sup>, Ruguang Ma<sup>2</sup>, Qian Liu<sup>2,3,\*</sup>, Jun Luo<sup>1,3</sup>, Jiacheng Wang<sup>2,3,\*</sup>

<sup>1</sup>School of Materials Science and Engineering, Shanghai University, 99 Shangda Road, Shanghai 200444, People's Republic of China

<sup>2</sup>State Key Laboratory of High Performance Ceramics and Superfine Microstructure, Shanghai Institute of Ceramics, Chinese Academy of Sciences, 1295 Dingxi Road, Shanghai 200050, People's Republic of China

<sup>3</sup>Shanghai Institute of Materials Genome, Shanghai, People's Republic of China

\*Corresponding authors.

Email: [jiacheng.wang@mail.sic.ac.cn](mailto:jiacheng.wang@mail.sic.ac.cn), [qianliu@mail.sic.ac.cn](mailto:qianliu@mail.sic.ac.cn)

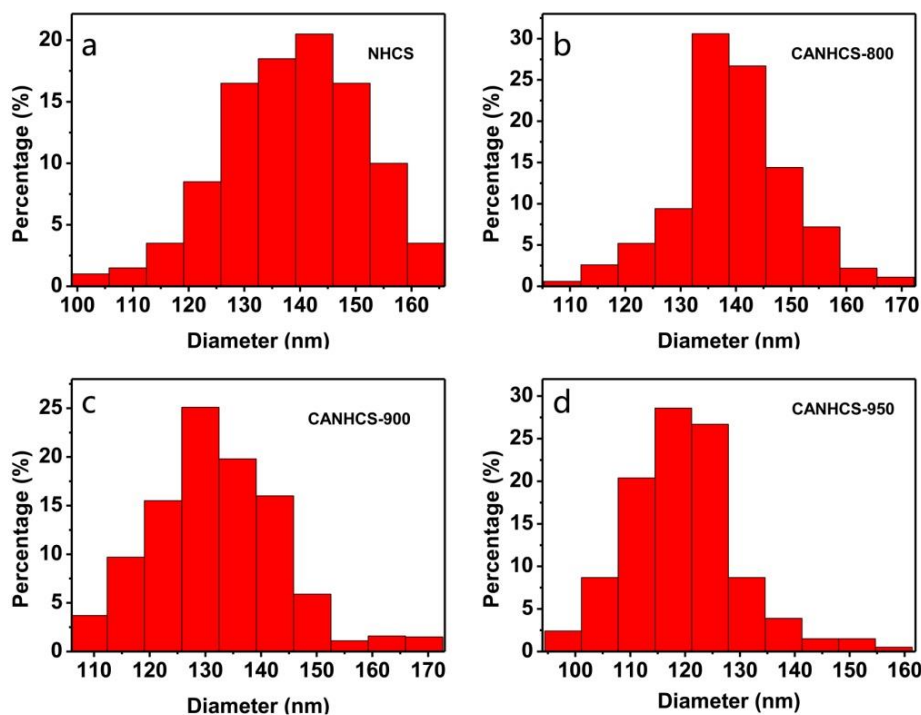

**Fig. S1** Diameter distributions of **a** NHCS, **b** CANHCS-800, **c** CANHCS-900, **d** CANHCS-950

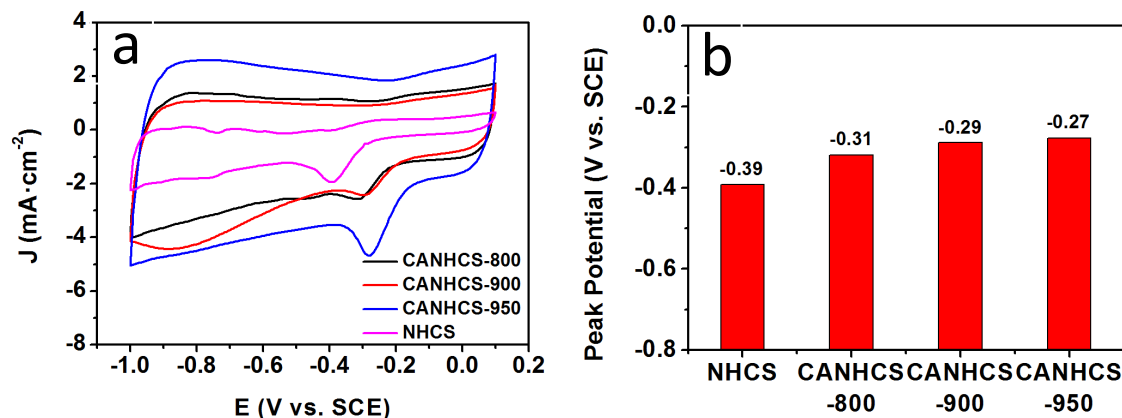

**Fig. S2** **a** Cyclic voltammograms (CV) of the CANHCS-800, CANHCS-900, CANHCS-950, and NHCSs in O<sub>2</sub>-saturated 0.1 M solution of KOH electrolyte at a scan rate of 50 mV s<sup>-1</sup> and **b** the potential of ORR peak from the cyclic voltammograms (CV) in panel **a**

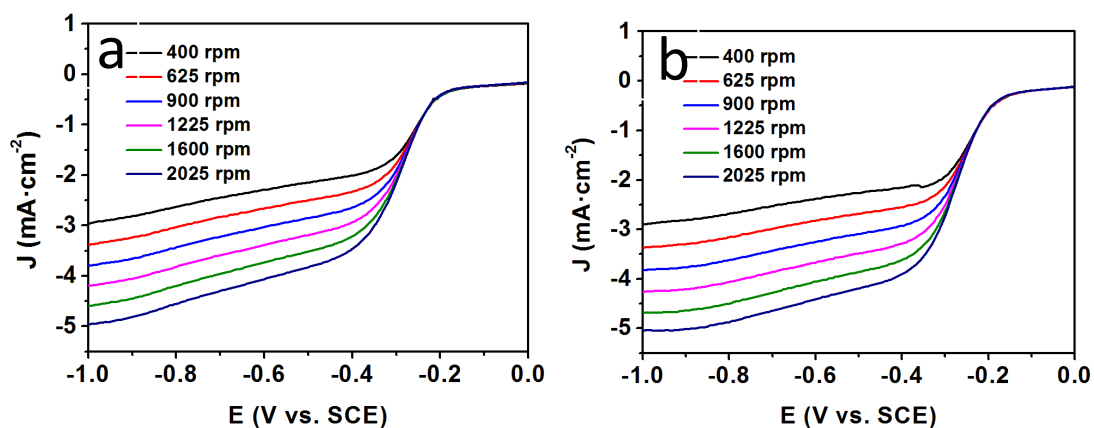

**Fig. S3** Linear sweep voltammetry (LSV) curves of **a** CANHCS-800, **b** CANHCS-900 in O<sub>2</sub>-saturated 0.1 M KOH electrolyte at different rotating speeds from 400 to 2025 rpm

**Table S1** the comparison for the electrochemical performances of the N-doped carbon shells

| Catalysts    | $E_{\text{onset}} - E_{\text{onset(Pt/C)}}$<br>(mV vs. SCE) | $E_{1/2} - E_{1/2(\text{Pt/C})}$<br>(mV vs. SCE) | Current density<br>(mA cm <sup>-2</sup> ) | Ref.      |
|--------------|-------------------------------------------------------------|--------------------------------------------------|-------------------------------------------|-----------|
| CANHCS-950   | 70                                                          | 74                                               | 5.91                                      | This work |
| HMNC-0.5-800 | 60                                                          | 100                                              | 4.25                                      | [1]       |
| N-CS         | -5                                                          | 0                                                | 3.2                                       | [2]       |
| HMC          | 50                                                          | 0                                                | 5.0                                       | [3]       |
| NHCS         | 200                                                         | 210                                              | 3.8                                       | [4]       |
| NHCS91       | 100                                                         | 200                                              | 4.6                                       | [5]       |
| 3D-960HGBs   | 150                                                         | 110                                              | 4.9                                       | [6]       |

## References

- [1] R. Wu, S. Chen, Y. Zhang, Y. Wang, Y. Nie, W. Ding, X. Qi, Z. Wei, Controlled synthesis of hollow micro/meso-pore nitrogen-doped carbon with tunable wall thickness and specific surface area as efficient electrocatalysts for oxygen reduction reaction. *J. Mater. Chem. A* **4**(7), 2433-2437 (2016). doi:[10.1039/C5TA09859A](https://doi.org/10.1039/C5TA09859A)
- [2] G.A. Ferrero, K. Preuss, A.B. Fuertes, M. Sevilla, M.M. Titirici, The influence of pore size distribution on the oxygen reduction reaction performance in nitrogen doped carbon microspheres. *J. Mater. Chem. A* **4**(7), 2581-2589 (2016). doi:<https://doi.org/10.1039/C5TA10063A>
- [3] L. Hadidi, E. Davari, M. Iqbal, T.K. Purkait, D.G. Ivey, J.G. Veinot, Spherical nitrogen-doped hollow mesoporous carbon as an efficient bifunctional electrocatalyst for zn-air batteries. *Nanoscale* **7**(48), 20547-20556 (2015). doi:<https://doi.org/10.1039/C5NR06028A>
- [4] Z. Wu, R. Liu, J. Wang, J. Zhu, W. Xiao, C. Xuan, W. Lei, D. Wang, Nitrogen and sulfur co-doping of 3D hollow-structured carbon spheres as an efficient and stable metal free catalyst for the oxygen reduction reaction. *Nanoscale* **8**(45), 19086 (2016). doi:<https://doi.org/10.1039/C6NR06817K>
- [5] J. Sanetuntikul, T. Hang, S. Shanmugam, Hollow nitrogen-doped carbon spheres as efficient and durable electrocatalysts for oxygen reduction. *Chem. Commun.* **50**(67), 9473-9476 (2014). doi:<https://doi.org/10.1039/C4CC03437F>
- [6] Y. Lu, M. Liu, H. Nie, C. Gu, M. Liu, Z. Yang, K. Yang, X.A. Chen, S. Huang, Direct fabrication of metal-free hollow graphene balls with a self-supporting structure as efficient cathode catalysts of fuel cell. *J. Nanoparticle Res.* **18**(6), 1-9 (2016). doi:[10.1007/s11051-016-3457-3](https://doi.org/10.1007/s11051-016-3457-3)
